# Supplementary material for: Prevalence and Clinical Characteristics of Hearing Loss Caused by MYH14 Variants
Source: MDPI journal article supplement (doi:10.3390/genes12101623), 2021-10-15
Supplement: s1 [file s1]

**Table S1. 68 Deafness-causative genes**

| No | Locus Symbol       | Gene Symbol     | Gene ID      | Transcript Variant                                                     |
|----|--------------------|-----------------|--------------|------------------------------------------------------------------------|
| 1  | DFNA1              | <i>DIAPH1</i>   | NM_005219    | NM_001079812                                                           |
| 2  | DFNA2              | <i>KCNQ4</i>    | NM_004700    | NM_172163                                                              |
| 3  | DFNA2              | <i>GJB3</i>     | NM_024009    | NM_001005752                                                           |
| 4  | DFNA3              | <i>GJB6</i>     | NM_006783    | NM_001110219<br>NM_001110220<br>NM_001110221                           |
| 5  | DFNA4              | <i>MYH14</i>    | NM_024729    | NM_001145809<br>NM_001077186                                           |
| 6  | DFNA5              | <i>DFNA5</i>    | NM_004403    | NM_001127454<br>NM_001127453                                           |
| 7  | DFNA6/14/38        | <i>WFS1</i>     | NM_006005    | NM_001145853                                                           |
| 8  | DFNA8/12/DFNB21    | <i>TECTA</i>    | NM_005422    | –                                                                      |
| 9  | DFNA9/31           | <i>COCH</i>     | NM_004086    | NM_001135058                                                           |
| 10 | DFNA10             | <i>EYA4</i>     | NM_004100    | NM_172103<br>NM_172105                                                 |
| 11 | DFNA11/DFNB2/USH1B | <i>MYO7A</i>    | NM_000260    | NM_001127179<br>NM_001127180                                           |
| 12 | DFNA13/DFNB53/STL3 | <i>COL11A2</i>  | NM_080680    | NM_080679<br>NM_080681<br>NM_001163771                                 |
| 13 | DFNA15             | <i>POU4F3</i>   | NM_002700    | –                                                                      |
| 14 | DFNA17             | <i>MYH9</i>     | NM_002473    | –                                                                      |
| 15 | DFNA20/DFNB26      | <i>ACTG1</i>    | NM_001614    | NM_001199954                                                           |
| 16 | DFNA22/DFNB37      | <i>MYO6</i>     | NM_004999    | –                                                                      |
| 17 | DFNA25             | <i>SLC17A8</i>  | NM_139319    | NM_001145288                                                           |
| 18 | DFNA28             | <i>GRHL2</i>    | NM_024915    | –                                                                      |
| 19 | DFNA36/DFNB7/11    | <i>TMC1</i>     | NM_138691    | –                                                                      |
| 20 | DFNA40             | <i>CRYM</i>     | NM_001888    | NM_001014444                                                           |
| 21 | DFNA44             | <i>CCDC50</i>   | NM_178335    | NM_174908                                                              |
| 22 | DFNA48             | <i>MYO1A</i>    | NM_005379    | –                                                                      |
| 23 | DFNA50             | <i>MIRN96</i>   |              |                                                                        |
| 24 | DFNA51             | <i>TJP2</i>     | NM_001170414 | NM_004817<br>NM_201629<br>NM_001170630<br>NM_001170415<br>NM_001170416 |
| 25 | DFNA64             | <i>DIABLO</i>   | NM_019887    | NM_138929                                                              |
| 26 |                    | <i>CEACAM16</i> | NM_001039213 | –                                                                      |
| 27 | DFNB1/DFNA3        | <i>GJB2</i>     | NM_004004    | –                                                                      |
| 28 | DFNB3              | <i>MYO15A</i>   | NM_016239    | –                                                                      |
| 29 | DFNB4/Pendred      | <i>SLC26A4</i>  | NM_000441    | –                                                                      |
| 30 | DFNB6              | <i>TMIE</i>     | NM_147196    | –                                                                      |

|                 |                 |              |                                                                                                                                                              |
|-----------------|-----------------|--------------|--------------------------------------------------------------------------------------------------------------------------------------------------------------|
| 31 DFNB8/10     | <i>TMPRSS3</i>  | NM_024022    | NM_032405                                                                                                                                                    |
| 32 DFNB9        | <i>OTOF</i>     | NM_194248    | NM_194322<br>NM_194323<br>NM_004802                                                                                                                          |
| 33 DFNB12       | <i>CDH23</i>    | NM_022124    | NM_001171930<br>NM_001171931<br>NM_001171932<br>NM_001171933<br>NM_001171934<br>NM_001171936<br>NM_052836                                                    |
| 34 DFNB15/72/95 | <i>GIPC3</i>    | NM_133261    | –                                                                                                                                                            |
| 35 DFNB16       | <i>STRC</i>     | NM_153700    | –                                                                                                                                                            |
| 36 DFNB18/USH1C | <i>USH1C</i>    | NM_153676    | NM_005709                                                                                                                                                    |
| 37 DFNB22       | <i>OTOA</i>     | NM_144672    | NM_001161683<br>NM_170664                                                                                                                                    |
| 38 DFNB23/USH1F | <i>PCDH15</i>   | NM_033056    | NM_001142763<br>NM_001142764<br>NM_001142765<br>NM_001142766<br>NM_001142767<br>NM_001142769<br>NM_001142770<br>NM_001142771<br>NM_001142772<br>NM_001142773 |
| 39 DFNB24       | <i>RDX</i>      | NM_002906    | –                                                                                                                                                            |
| 40 DFNB25       | <i>GRXCR1</i>   | NM_001080476 | –                                                                                                                                                            |
| 41 DFNB28       | <i>TRIOBP</i>   | NM_007032    | NM_138632<br>NM_001039141                                                                                                                                    |
| 42 DFNB29       | <i>CLDN14</i>   | NM_144492    | NM_001146077<br>NM_001146078<br>NM_001146079<br>NM_012130                                                                                                    |
| 43 DFNB30       | <i>MYO3A</i>    | NM_017433    | –                                                                                                                                                            |
| 44 DFNB31/USH2D | <i>WHRN</i>     | NM_015404    | NM_001083885<br>NM_001173425                                                                                                                                 |
| 45 DFNB35       | <i>ESRRB</i>    | NM_004452    | –                                                                                                                                                            |
| 46 DFNB36       | <i>ESPN</i>     | NM_031475    | –                                                                                                                                                            |
| 47 DFNB39       | <i>HGF</i>      | NM_000601    | NM_001010931<br>NM_001010932<br>NM_001010933<br>NM_001010934                                                                                                 |
| 48 DFNB42       | <i>ILDR1</i>    | NM_001199799 | NM_001199800<br>NM_175924                                                                                                                                    |
| 49 DFNB48       | <i>CIB2</i>     | NM_006383    | NM_001271888<br>NM_001271889                                                                                                                                 |
| 50 DFNB49       | <i>MARVELD2</i> | NM_001038603 | NM_001244734                                                                                                                                                 |

|              |                 |              |                                                     |
|--------------|-----------------|--------------|-----------------------------------------------------|
| 51 DFNB59    | <i>DFNB59</i>   | NM_001042702 | –                                                   |
| 52 DFNB61    | <i>SLC26A5</i>  | NM_206883    | NM_001167962<br>NM_206884<br>NM_206885<br>NM_198999 |
| 53 DFNB63    | <i>LRTOMT</i>   | NM_001145307 | NM_001145308<br>NM_001205138<br>NM_145309           |
| 54 DFNB66/67 | <i>LHFPL5</i>   | NM_182548    | –                                                   |
| 55 DFNB70    | <i>PNPT1</i>    | NM_033109    | –                                                   |
| 56 DFNB74    | <i>MSRB3</i>    | NM_198080    | NM_001031679<br>NM_001193460<br>NM_001193461        |
| 57 DFNB77    | <i>LOXHD1</i>   | NM_144612    | NM_001173129<br>NM_001145472<br>NM_001145473        |
| 58 DFNB79    | <i>TPRN</i>     | NM_001128228 | –                                                   |
| 59 DFNB82    | <i>GPSM2</i>    | NM_013296    | –                                                   |
| 60 DFNB84    | <i>PTPRQ</i>    | NM_001145026 | –                                                   |
| 61 DFNB89    | <i>KARS</i>     | NM_005548    | NM_001130089                                        |
| 62 DFNB91    | <i>SERPINB6</i> | NM_004568    | NM_001195291                                        |
| 63 DFNB93    | <i>CABP2</i>    | NM_016366    | –                                                   |
| 64 USH2A     | <i>USH2A</i>    | NM_007123    | NM_206933                                           |
| 65 DFNX1     | <i>PRPS1</i>    | NM_002764    | NM_001204402                                        |
| 66 DFNX2     | <i>POU3F4</i>   | NM_000307    | –                                                   |
| 67 DFNX4     | <i>SMPX</i>     | NM_014332    | –                                                   |
| 68 DFNX6     | <i>COL4A6</i>   | NM_001847    | NM_033641                                           |

---
